# Supplementary material for: Long-wavelength near-infrared light emitting Ni2+-doped double perovskite molybdate-based solid-solution phosphors
Source: Royal Society of Chemistry journal article supplement (doi:10.1039/d4ta03095h), 2024-01-01

## Long-wavelength Near-infrared of Ni<sup>2+</sup>-doped Double Perovskite Molybdate-based Solid-solution Phosphors

Fengmei Zhu<sup>1,3</sup>, Yuan Gao<sup>1,2\*</sup>, Jianbei Qiu<sup>1,2,3\*</sup>

<sup>1</sup>*Faculty of Material Science and Engineering, Kunming University of Science and Technology, Kunming 650093, China*

<sup>2</sup>*Key Lab. of Advanced Materials of Yunnan Province, Kunming 650093, China*

<sup>3</sup>*Southwest United Graduate School, Kunming 650092, China*

### Corresponding Author

\*E-mail: Yuan Gao (gaoyuankust@163.com); Jianbei Qiu (qiu@kust.edu.cn).

**Table S1.** Crystallographic parameters obtained from XRD *Rietveld* refinement of SBMMO-x (x= 1, 2, 3, 4 and 5) solid-solution phosphors, respectively.

|                   | SBMMO-1     | SBMMO-2     | SBMMO-3     | SBMMO-4     | SBMMO-5      |
|-------------------|-------------|-------------|-------------|-------------|--------------|
| Crystal structure | Tetragonal  | Tetragonal  | Tetragonal  | Tetragonal  | Cubic        |
| Space group       | <i>I4/m</i> | <i>I4/m</i> | <i>I4/m</i> | <i>I4/m</i> | <i>Pm-3m</i> |
| a, Å              | 7.849       | 7.832       | 7.820       | 7.802       | 8.074        |
| b, Å              | 7.849       | 7.832       | 7.820       | 7.802       | 8.074        |
| c, Å              | 7.917       | 7.931       | 7.944       | 7.973       | 8.074        |
| V, Å <sup>3</sup> | 487.741     | 486.489     | 485.794     | 485.326     | 526.339      |
| R <sub>p</sub> %  | 6.56        | 5.77        | 7.82        | 8.46        | 7.01         |
| R <sub>wp</sub> % | 5.73        | 6.24        | 6.38        | 9.47        | 6.16         |
| χ <sup>2</sup> %  | 3.14        | 2.76        | 2.99        | 2.51        | 2.97         |

**Table S2.** Calculated crystal field parameters obtained from optical spectra of SBMMO-x (x= 1, 2, 3, 4 and 5) solid-solution phosphors, respectively.

|                                       | SBMMO-1  | SBMMO-2  | SBMMO-3  | SBMMO-4 | SBMMO-5  |
|---------------------------------------|----------|----------|----------|---------|----------|
| ${}^3A_2(F) \rightarrow {}^3T_1(P)$ , | 384      | 386      | 390      | 391     | 395      |
| nm                                    |          |          |          |         |          |
| ${}^3A_2(F) \rightarrow {}^3T_2(F)$ , | 1158     | 1182     | 1226     | 1270    | 1370     |
| nm                                    |          |          |          |         |          |
| $\nu_3, \text{cm}^{-1}$               | 26041.66 | 25906.73 | 25641.02 | 25575   | 25316.45 |
| $\nu_1, \text{cm}^{-1}$               | 8635.57  | 8460.23  | 8156.6   | 7874.01 | 7299.27  |
| $D_q, \text{cm}^{-1}$                 | 863.557  | 846.023  | 815.66   | 787.4   | 729.927  |
| $B, \text{cm}^{-1}$                   | 969.498  | 978.799  | 992.118  | 1017.07 | 1057.35  |
| $D_q/B$                               | 0.8907   | 0.8643   | 0.8221   | 0.7741  | 0.6903   |

**Figure S1.** Rietveld refinement profiles of (a) SBMMO-2, (b) SBMMO-3, (c) SBMMO-4, and (d) SBMMO-5, respectively.

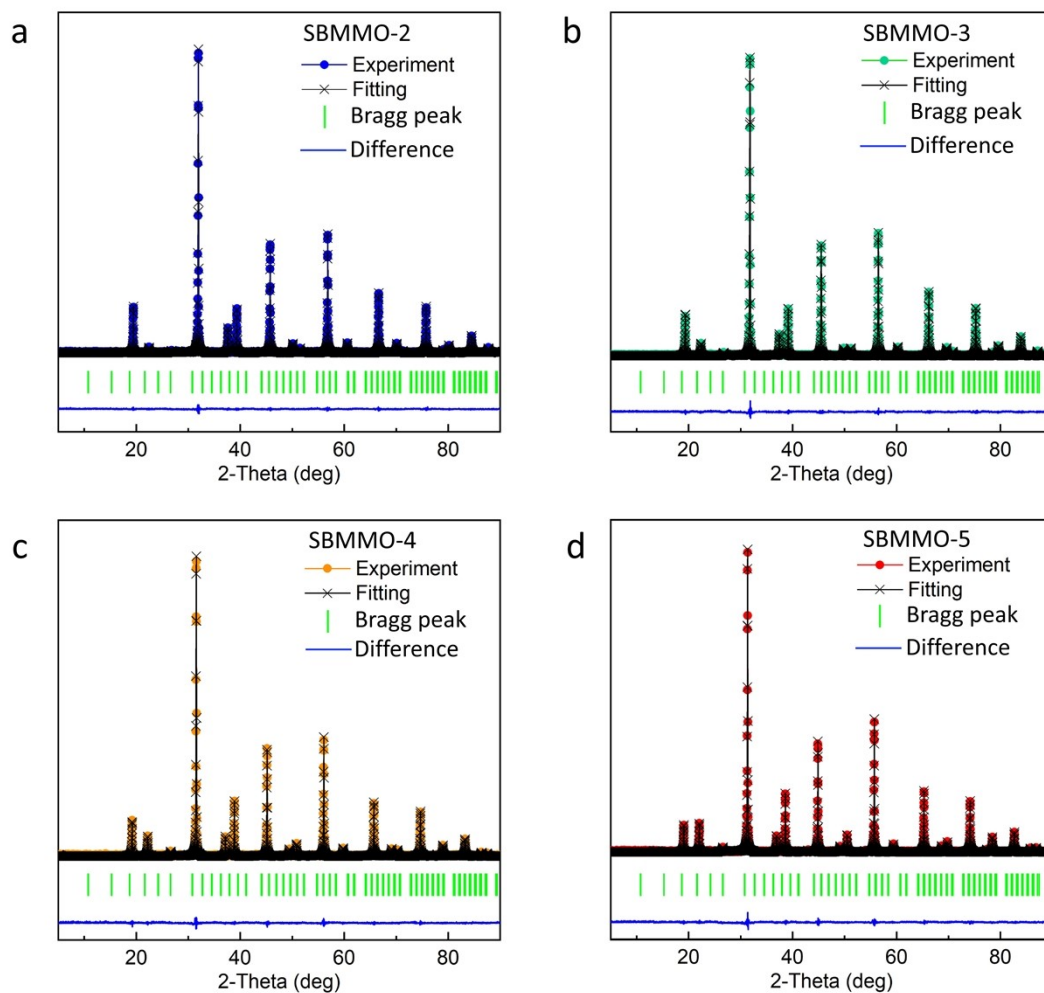

**Figure S2.** The plot of absorption coefficient against photon energy for non-doping SBMMO-x (x= 1, 2, 3, 4 and 5) host.

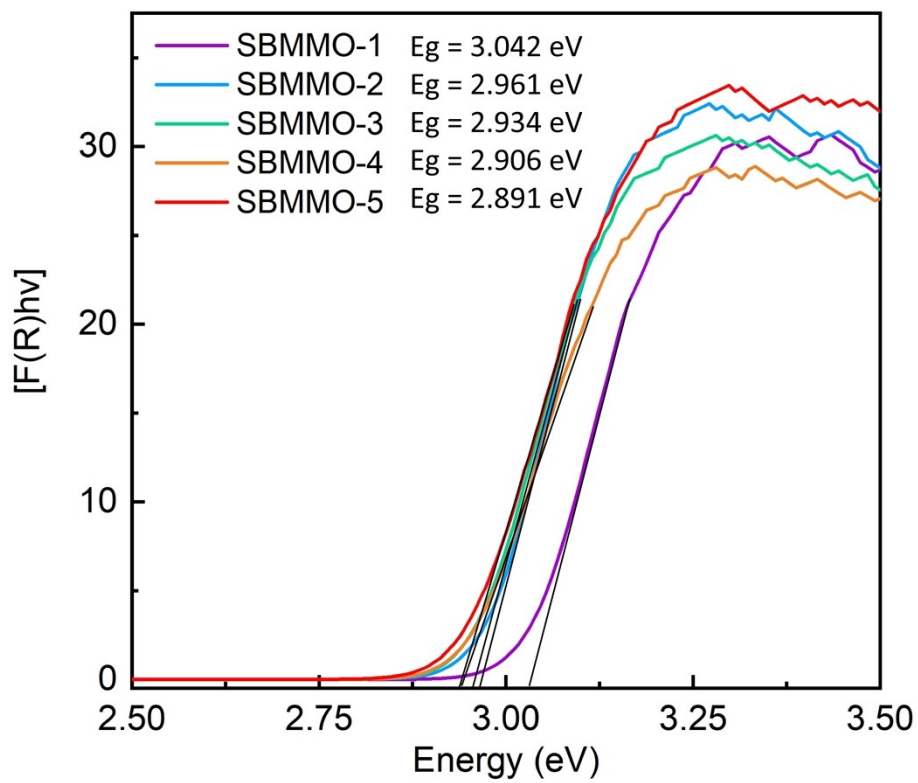

**Figure S3.** The Arrhenius plot of  $\text{Ln}(I/I_0-1)$  versus  $1/K_B T$  of of SBMMO-x (x= 1, 2, 3, 4 and 5) solid-solution phosphors, respectively.

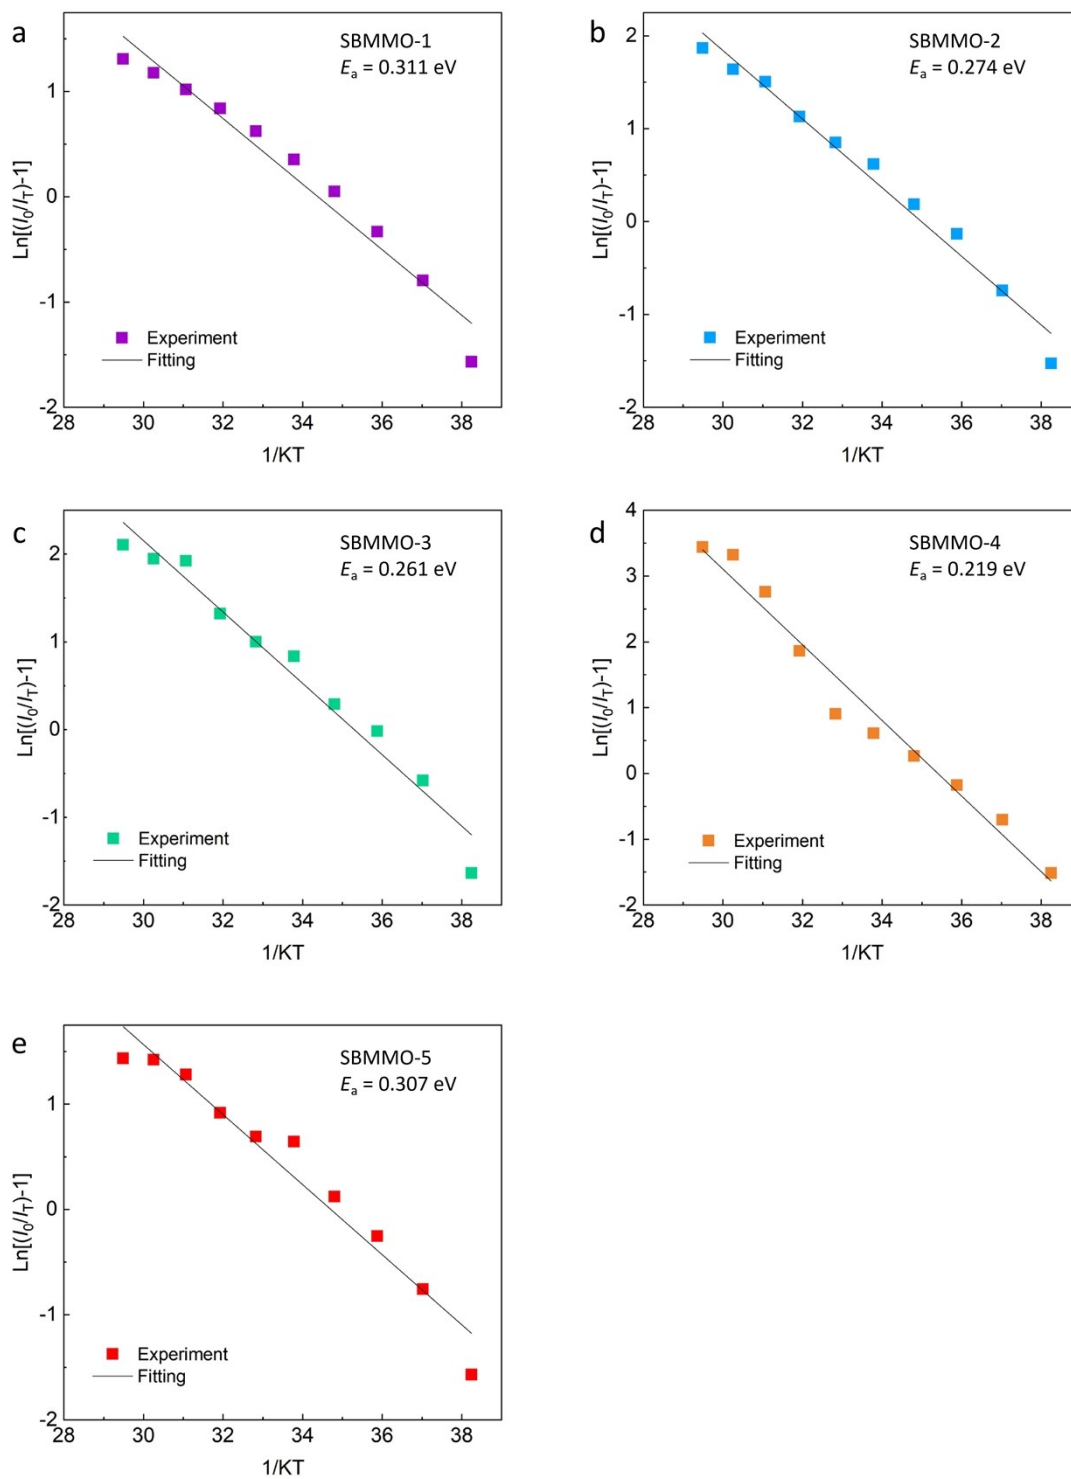

Supplement: d4ta03095h1.pdf [file d4ta03095h1.pdf]
